# Supplementary material for: Identification and Functional Validation of the Novel Antimalarial Resistance Locus PF10_0355 in Plasmodium falciparum
Source: PLoS Genet. 2011 Apr 21;7(4):e1001383. doi: 10.1371/journal.pgen.1001383 (PMC3080868; doi:10.1371/journal.pgen.1001383)
Supplement: Dataset S1 — Drug data, PF10_0355 copy number data, and top GWAS and LRH hits. (0.06 MB XLS) [file pgen.1001383.s001.xls]

## Sheet: phenotypes
sample	ADQ	ARTM	ARTN	ARTS	ATV	CQ	DHA	HFG	HFN	LUM	MFQ	PIP	QN
10_54	16.48	1.551	3.079	2.002	3.335	63.57	0.7305	1.032	1.832	29.22	5.844	30.61	60.14
36_89	16.63	4.431	4.418	8.947	3.327	79.45	5.916	1.139	1.491	21.22	3.865	30.95
3D7	6.8168	2.8094	3.6543	8.4817	2.6474	8.8972	2.5971	0.9846	6.6259	86.2639	20.8618	19.0066	24.5422
51	29.53	3.661	3.688	9.564	4.192	108.2	3.005		2.509	20.59	7.559	41.53	125.9
608	15.16	3.089	3.07	4.351	6.978	93.25	2.784	1.155	1.198	10.09	5.83	10.47	104.9
7G8	18.37	1.464	3.1	2.988	4.161	56.18	2.789	0.7968	1.071	31.1	6.053	40.11	38.87
9_411		1.158	1.66	5.99			0.8257		1.525	5.687	0.6979	54.52
CF04.008_1F		3.718	3.035	6.777	0.8209	6.02	2.522	1.094	3.481	36.68	4.939	18.71	82.44
CF04.009		4.1495	3.771	8.845			1.7316		9.792	72.48	10.356	29.865
D10	15.2461	3.5656	7.2633	8.7383	2.3062	11.6735	4.4617	1.5121	10.5989	92.63	25.4271	38.127	18.1534
D6	14.92	2.076	3.138	6.612	0.6697	3.611	1.333	0.4141	6.201	29.56	6.216	3.999	4.898
Dd2	10.0602	3.4412	3.5525	9.2125	1.2793	73.4253	2.3138	0.8717	4.7277	74.7528	14.9576	26.21	78.8966
FCC2	9.687	3.165	3.202	8.728	1.213	9.47	4.096	1.48	7.74	156.3	35.99	24.36	27.95
GA3	15.11	3.591	3.203	6.281	2.391	102.1	3.674	1.495	6.49		27.22	43.25	31.96
GH2	23.3	6.718	5.983	16.78	2.366	98.03	5.694	1.707	16.03	346.7	17.82	48.54	149.1
HB3	8.703	1.169	3.019	3.117	1.181	9.78	0.9405	1.413	2.764	71.51	11.18	31.22	20.28
IGHCR14	4.879	0.6559	1.416	1.202	0.4847	4.967	0.382	1.451	1.725	53.57	11.51	9.564	4.99
Indochina_I	12	20.57	19.6			243.1		0.8852	0.0004	6.178	3.902	28.99	153
JST	30.02	2.35	5.658	3.838	2.193	129.1	1.698	1.203	1.296	22.07	6.811	41.34	24.52
K1	16.07	1.902	3.124	3.176	2.442	86.42	3.509	1.52	1.907	30.84	13.57	35.78	77.81
M24	7.63	4.6	4.43	5.546	1.524	13.09	2.49	1.158	1.919	59.81	13.48	14.23	55.33
Malayan_Camp	7.944	2.887	1.811	1.775	1.171	7.279	2.319	1.126	1.283		6.983	31.26	8.196
Muz51.1	19.64	3.29	3.18	7.449	1.939	60.44	2.271	1.13	1.696	19.5	8.501	28.23	39.73
PR145	11.11	15.79	13.66	29.7	6.59	51.24	12.02	1.106	16	140.8	53.43	31.58	149.1
RAJ116	19.23	1.075	1.805	1.367	1.315	68.59	1.035	1.546	0.0049	6.418	4.105	34.31	4.36
RO33	11.3737	2.6614	6.0825	6.9751	1.8615	11.0702	2.8762	1.6415	3.1416	69.66	8.094	34.0955	13.4901
Santa_Lucia	20.44	3.629	4.61	8.644	0.3903	11.76	3.567	1.171	0.7153	30.34	5.822	38.02	260.1
SenP05.02	16.24	5.695	3.178	11.25	2.493		3.518	1.52	0.9853	30.43	6.798	29
SenP08.04	17.33	4.873	4.15	11.12	1.19	14.85	3.015	0.4386	11.72	62.21	26.03	7.81	44.76
SenP09.04	4.517	5.332	4.177	15.7	0.7054	8.312	5.092	1.404	9.234	174	25.44	14.78	54.86
SenP11.02	92.05	12.75	11.15	19.99	1.881	25.83	8.258	0.7377	17.35	88.75	44.76	14.44	94.63
SenP19.04	7.157	11.66	10.98	24.04		11.4	9.225	1.858	14.71	95.17	50.83	30.21
SenP26.04	44.23	12.71	3.23	14.82	1.143	40.38	8.889	0.4341	20.6	57.79	84.86	5.288
SenP27.02	9.269	3.232	3.635	8.222		9.813	2.664	1.258	1.83	31.2	5.972	21.2
SenP31.01	6.961	1.991	1.999	6.131	0.4997	8.854	2.966	1.214	3.177	78.89	17.03	22.56
SenP51.02	29.62	5.041	4.748	8.875	0.3225	62.05	3.398	1.627	3.319	48.55	8.601	34.89	50.08
SenP60.02	15.8	4.084	4.978	9.62	0.9355	99.93	3.854	1.255	1.616	21.99	11.93	21.19	47.78
SenT15.04		3.595	3.016	6.9315			3.3665		5.262	51.32	3.948	49.53
SenT26.04	16.05	3.149	3.116	4.827	1.19	79.98	2.991	1.43	2.905	30.92	7.877	24.72	121.1
SenT28.04	11.9	3.744	3.139	7.846	1.1	51.01	2.343	1.461	7.5	62.69	32.64	15.63	139.6
SenV34.04	21.39	5.1	4.645	6.781	0.5187		3.024	1.627	2.37	30.34	4.018	28.48
SenV35.04	5.567	3.078	3.68	4.706	0.8165	9.364	5.374	1.359	2.761	45.52	20.6	26.28
SenV42.05	6.456	1.06	1.565	1.717	0.7363	9.594	1.731	1.016	4.476	13.6	10.04	4.485
TD203	15.63	8.15	4.736	20.56	8.49	52.86	8.507	1.071	7.938	156.2	30.32	39.2	67.53
TD257	11.68	11.88	8.532	24.53	2.215	55.41	11.63	1.539	15.96	227.6	50.42	35.53	253.5
TM327	9.891	6.032	1.7	8.862	1.146	41.12	3.851	2.022	15.49	249.3	41.25	50.89	70.72
TM90C2A	18.85	16.17	10.31	28.32	3.704	58.94	5.376	1.086	12.51	264.5	28.04	30.04	209.1
TM91C235		12.43	12.46	17.66			7.409		70.65	154.5	57.96	12.69
VS_1	17.98	1.625	3.459	6.172	4.02	155.5	1.035	1.538	1.739	26.4	12.84	38.58	224.3
WR87		6.132	4.715	12.95			3.119		15.84	80.34	27.96	35.71

## Sheet: PF10_0355 copy
sample	HFN	PF10_0355_copynum
10_54	1.832	0.99
36_89	1.491	1.07
3D7	6.6259	1
51	2.509	0.77
608	1.198
7G8	1.071	0.74
9_411	1.525
CF04.008_1F	3.481	0.95
CF04.009	9.792
D10	10.5989	1.06
D6	6.201
Dd2	4.7277	1.07
FCC2	7.74	0.76
GA3	6.49
GH2	16.03	1.71
HB3	2.764	0.88
IGHCR14	1.725	1.63
Indochina_I	0.0004	0.92
JST	1.296	1.06
K1	1.907	0.87
M24	1.919	0.76
Malayan_Camp	1.283	0.94
Muz51.1	1.696	0.64
PR145	16	0.94
RAJ116	0.0049	0.92
RO33	3.1416	1.26
Santa_Lucia	0.7153	1.03
SenP05.02	0.9853	0.98
SenP08.04	11.72	0.95
SenP09.04	9.234
SenP11.02	17.35	7.14
SenP19.04	14.71	1.06
SenP26.04	20.6	1.68
SenP27.02	1.83
SenP31.01	3.177	0.77
SenP51.02	3.319	1.09
SenP60.02	1.616	1.19
SenT15.04	5.262	1.71
SenT26.04	2.905
SenT28.04	7.5	0.73
SenV34.04	2.37	4.92
SenV35.04	2.761	0.86
SenV42.05	4.476	1.26
TD203	7.938	0.9
TD257	15.96
TM327	15.49
TM90C2A	12.51	1.43
TM91C235	70.65
V1_S		0.89
VS_1	1.739
WR87	15.84

## Sheet: GWAS q<0.5
chr	pos	test	drug	P
1	524295	emma	PIP	2.15925e-05
2	274190	emma	ATV	4.28517e-05
2	677991	emma	ARTS	3.69997e-05
3	447298	emma	LUM	5.80833e-05
3	561762	emma	PIP	3.07652e-05
4	904339	emma	QN	7.89769e-06
5	1084437	emma	DHA	5.55364e-05
6	652282	emma	ARTN	3.76039e-05
6	674154	emma	ATV	2.35775e-07
6	1115441	emma	ARTN	1.34889e-05
6	1290489	emma	HFG	5.66065e-05
7	459787	emma	CQ	4.72488e-07
7	567030	emma	HFG	4.68083e-05
7	691351	emma	MFQ	3.83414e-05
7	691365	emma	MFQ	1.55999e-05
7	1057925	emma	HFN	6.40177e-05
8	682727	emma	ATV	5.09065e-05
9	92083	emma	CQ	6.04516e-05
9	739235	emma	HFN	1.5251e-05
9	1206476	emma	PIP	2.48994e-05
10	719289	emma	ARTN	1.89204e-05
11	657349	emma	ATV	4.01017e-06
11	736184	emma	HFN	1.459e-05
11	738407	emma	HFN	7.20161e-07
12	1964935	emma	HFN	6.14858e-08
13	714410	emma	ARTN	5.86982e-06
13	757689	emma	HFN	1.28217e-07
13	1872932	emma	PIP	5.90709e-05
14	120299	emma	PIP	1.25363e-05
14	1233470	emma	HFN	5.32053e-07
14	1319412	emma	LUM	1.4802e-05
14	2003438	emma	QN	3.29214e-05
14	2116287	emma	HFN	3.95733e-05
14	3130449	emma	ATV	1.02703e-06
14	3288099	emma	QN	1.6222e-05
2	185343	HLR_protect_6	MFQ	2.7304e-05
3	156039	HLR_protect_6	ARTS	4.97987e-05
3	748492	HLR_risk_6	ARTM	4.18766e-05
3	748662	HLR_risk_6	ARTM	3.63587e-05
3	755177	HLR_risk_6	ARTM	6.30383e-05
3	761618	HLR_risk_6	ARTM	6.6912e-05
5	146372	HLR_risk_4	HFN	4.78596e-05
5	146372	HLR_risk_2	MFQ	1.18308e-05
5	146372	HLR_risk_4	MFQ	6.65746e-05
5	146696	HLR_risk_2	MFQ	3.08447e-05
5	635822	HLR_risk_6	MFQ	5.4696e-05
6	529071	HLR_risk_2	CQ	5.26332e-05
6	834461	HLR_risk_6	ARTM	5.40272e-06
6	1033119	HLR_risk_6	CQ	6.45079e-05
6	1040345	HLR_risk_6	CQ	6.63367e-05
6	1066990	HLR_protect_4	CQ	1.18046e-05
6	1214352	HLR_risk_4	ARTM	1.71192e-05
6	1215235	HLR_risk_4	ARTM	1.71192e-05
6	1238831	HLR_protect_4	ARTM	1.06681e-05
6	1238831	HLR_protect_6	ARTM	5.14869e-05
7	312434	HLR_protect_2	MFQ	1.78204e-05
7	459787	HLR_protect_2	CQ	7.67218e-06
7	460216	HLR_protect_2	CQ	7.67218e-06
7	460216	HLR_protect_4	CQ	8.27356e-06
7	460979	HLR_protect_2	CQ	7.67218e-06
7	496293	HLR_risk_6	CQ	2.66739e-05
7	496600	HLR_risk_6	CQ	3.01559e-05
7	907075	HLR_protect_2	HFN	9.69731e-06
7	1225732	HLR_risk_6	ADQ	3.11864e-05
7	1357920	HLR_protect_4	PIP	4.05938e-06
8	543598	HLR_protect_4	LUM	4.39755e-05
8	570689	HLR_risk_4	ARTS	4.0125e-05
8	573419	HLR_risk_6	ARTS	1.46971e-05
8	573419	HLR_risk_4	ARTS	2.92885e-05
8	573419	HLR_risk_2	ARTS	2.29057e-05
8	576955	HLR_risk_4	ARTS	2.22075e-05
8	583324	HLR_protect_2	LUM	1.8773e-05
9	468966	HLR_protect_2	ATV	4.07565e-05
9	824021	HLR_protect_2	ATV	6.62208e-05
10	687736	HLR_risk_6	ARTN	5.96329e-05
10	687770	HLR_risk_4	ARTN	4.17294e-05
10	687775	HLR_risk_2	ARTN	4.58403e-05
10	802925	HLR_protect_2	ARTM	3.05039e-05
10	924465	HLR_risk_6	ADQ	2.32624e-05
10	1435286	HLR_risk_6	HFN	2.54344e-05
10	1435370	HLR_risk_4	HFN	2.08794e-05
10	1435370	HLR_risk_6	HFN	4.71014e-06
10	1437695	HLR_risk_6	HFN	4.24525e-06
10	1513214	HLR_protect_4	CQ	4.18514e-05
11	136308	HLR_risk_4	ADQ	4.59181e-05
11	136315	HLR_risk_6	ADQ	1.75595e-05
11	351441	HLR_risk_6	ARTM	1.12008e-05
11	351694	HLR_risk_6	ARTM	5.90642e-05
11	1117180	HLR_risk_6	ADQ	4.49178e-05
11	1119017	HLR_risk_6	ADQ	2.81065e-05
11	1119017	HLR_risk_4	ADQ	4.53888e-05
11	1123028	HLR_risk_4	ADQ	5.24944e-06
11	1123028	HLR_risk_6	ADQ	3.02109e-05
11	1123028	HLR_risk_2	ADQ	5.26409e-06
11	1124030	HLR_risk_6	ADQ	8.38805e-06
11	1124030	HLR_risk_4	ADQ	1.17392e-05
12	646088	HLR_protect_4	ATV	1.42637e-05
12	655208	HLR_protect_2	ATV	9.51283e-06
12	929122	HLR_protect_4	CQ	4.00937e-05
12	1554715	HLR_protect_2	ADQ	2.01248e-05
12	1554721	HLR_protect_2	ADQ	2.01248e-05
12	1554721	HLR_protect_4	ADQ	4.06505e-06
12	1554726	HLR_protect_2	ADQ	1.52158e-05
13	1247715	HLR_protect_2	MFQ	1.4892e-05
13	1561897	HLR_protect_4	ATV	2.60328e-05
13	1968077	HLR_risk_6	ARTM	5.77703e-05
14	1391987	HLR_risk_6	CQ	3.45975e-05
14	1394737	HLR_risk_6	CQ	1.44757e-05
14	1437571	HLR_protect_2	HFN	3.53271e-05
14	2235182	HLR_protect_6	ATV	1.74455e-05
14	2812679	HLR_protect_4	ARTS	1.03453e-05
14	2814793	HLR_protect_2	ARTS	2.87826e-05
14	2814793	HLR_risk_2	ARTS	4.89619e-06
14	2814793	HLR_protect_4	ARTS	2.11338e-05
14	2815714	HLR_risk_4	ARTS	3.97774e-05

## Sheet: LRH q<0.5
chr	pos	core allele	hap len	qvalue	gene	description
1	534252	A	399	0.359557	PFA0665w	hypothetical protein, conserved in P. falciparum
2	608790	G	14428	0.207119	PFB0675w	hypothetical protein
2	617743	T	16930	0.213323	PFB0685c	acyl-CoA synthetase, PfACS9
2	623146	C	22333	0.03228	PFB0687c	RING zinc finger protein, putative
3	351177	C	27424	0.359835	PFC0340w	DNA polymerase delta small subunit, putative
3	466483	A	35321	0.0567775	PFC0460w	hypothetical protein, conserved
3	466610	A	35448	0.0132541	PFC0460w	hypothetical protein, conserved
3	613195	A	6242	0.35925	PFC0640w	CSP and TRAP-related protein (CTRP)
4	59585	A	6404	0.280315	PFD0020c	erythrocyte membrane protein 1 (PfEMP1)
4	755220	T	15162	0.123636	PFD0830w	bifunctional dihydrofolate reductase-thymidylate synthase
4	755243	C	15139	0.213323	PFD0830w	bifunctional dihydrofolate reductase-thymidylate synthase
4	764100	G	50270	0.152812	PFD0840w	hypothetical protein, conserved
4	828035	T	12990	0.359835	PFD0885c	hypothetical protein, conserved
5	1042120	A	18768	0.00749582	PFE1250w	acetyl-CoA synthetase, PfACS10
5	1042527	A	18361	0.00846307	PFE1250w	acetyl-CoA synthetase, PfACS10
5	1056621	T	14545	0.0590762
5	1159412	C	12844	0.00846307	PFE1400c	beta adaptin protein, putative
5	1159501	T	12755	0.00846307	PFE1400c	beta adaptin protein, putative
5	1284799	T	13549	0.359835	PFE1570c	hypothetical protein, conserved
5	1333609	G	5132	0.234134	PFE1640w	erythrocyte membrane protein 1 (PfEMP1), truncated
5	1333639	G	5102	0.234134	PFE1640w	erythrocyte membrane protein 1 (PfEMP1), truncated
5	1333690	T	5051	0.0663805	PFE1640w	erythrocyte membrane protein 1 (PfEMP1), truncated
5	1333703	A	5038	0.234134	PFE1640w	erythrocyte membrane protein 1 (PfEMP1), truncated
5	1333716	G	5025	0.234134	PFE1640w	erythrocyte membrane protein 1 (PfEMP1), truncated
5	1333729	T	5012	0.234134	PFE1640w	erythrocyte membrane protein 1 (PfEMP1), truncated
5	1333741	G	5000	0.234134	PFE1640w	erythrocyte membrane protein 1 (PfEMP1), truncated
5	1333790	A	4951	0.234134	PFE1640w	erythrocyte membrane protein 1 (PfEMP1), truncated
6	536577	T	4647	0.320664
6	730599	A	1115	0.42047	PFF0845c	erythrocyte membrane protein 1 (PfEMP1)
6	736219	C	60156	0.458595	PFF0847w	Stevor, pseudogene
6	741192	A	55183	0.233529
6	741293	C	55082	0.213323	PFF0855c	rifin
6	741366	A	55009	0.213323	PFF0855c	rifin
6	1025852	A	17872	0.213323	PFF1220w	hypothetical protein, conserved
6	1032318	T	33580	0.355686
6	1065237	G	33215	0.14921	PFF1280w	hypothetical protein, conserved
6	1098314	C	26112	0.0905236	PFF1325c	c3h4-type ring finger protein, putative
6	1114565	C	25158	0.0905236	PFF1350c	acetyl-coenzyme a synthetase
6	1114929	G	23554	0.03228	PFF1350c	acetyl-coenzyme a synthetase
6	1115373	A	23998	0.03228	PFF1350c	acetyl-coenzyme a synthetase
6	1115454	C	23938	0.0429798	PFF1350c	acetyl-coenzyme a synthetase
6	1116047	G	24531	0.0244492	PFF1350c	acetyl-coenzyme a synthetase
6	1116171	G	24655	0.0429798	PFF1350c	acetyl-coenzyme a synthetase
6	1116315	C	24799	0.0429798	PFF1350c	acetyl-coenzyme a synthetase
6	1117520	G	26004	0.0429798	PFF1350c	acetyl-coenzyme a synthetase
6	1124426	C	32910	0.0535053	PFF1365c	HECT-domain (ubiquitin-transferase), putative
6	1256677	G	17639	0.458595	PFF1460c	hypothetical protein, conserved
6	1283916	G	13004	0.197833
7	428373	C	39799	0.126943	PF07_0027	DNA-directed RNA polymerase 2 8.2 kDa polypeptide, putative
7	449953	C	31672	0.044317
7	459787	T	21838	0.027642	MAL7P1_27	chloroquine resistance transporter
7	460216	G	21409	0.044317	MAL7P1_27	chloroquine resistance transporter
7	461218	T	20407	0.044317	MAL7P1_27	chloroquine resistance transporter
7	465826	G	39654	0.0952935	PF07_0035	cg1 protein
7	465826	G	16307	0.157965	PF07_0035	cg1 protein
7	467846	G	41674	0.0129602	PF07_0036	Cg6 protein
7	467846	G	14287	0.0190411	PF07_0036	Cg6 protein
7	475935	T	46758	0.0663805	PF07_0037	Cg2 protein
7	475935	T	26989	0.100936	PF07_0037	Cg2 protein
7	475948	A	46771	0.0663805	PF07_0037	Cg2 protein
7	475948	A	26976	0.100936	PF07_0037	Cg2 protein
7	476288	G	47111	0.0590762	PF07_0037	Cg2 protein
7	476305	C	47128	0.044317	PF07_0037	Cg2 protein
7	476305	C	26619	0.044317	PF07_0037	Cg2 protein
7	482133	T	10978	0.0132541	PF07_0038	Cg7 protein
7	482133	T	20791	0.00846307	PF07_0038	Cg7 protein
7	485744	G	14589	0.0132541	MAL7P1_28	ribonucleases p/mrp protein subunit, putative
7	485744	G	17180	0.00846307	MAL7P1_28	ribonucleases p/mrp protein subunit, putative
7	488164	A	15424	0.0777205	MAL7P1_28	ribonucleases p/mrp protein subunit, putative
7	488164	A	14760	0.0535053	MAL7P1_28	ribonucleases p/mrp protein subunit, putative
7	490748	C	18008	0.03228	PF07_0040	lysophospholipase-like protein, putative
7	490748	C	14664	0.0244492	PF07_0040	lysophospholipase-like protein, putative
7	490877	T	18137	0.03228	PF07_0040	lysophospholipase-like protein, putative
7	490877	T	14535	0.0132541	PF07_0040	lysophospholipase-like protein, putative
7	494285	A	21431	0.0550517	MAL7P1_29	hypothetical protein, conserved
7	505396	G	17088	0.213323	MAL7P1_30	hypothetical protein, conserved
7	505412	G	17104	0.213323	MAL7P1_30	hypothetical protein, conserved
7	511912	G	3768	0.42047	MAL7P1_30	hypothetical protein, conserved
7	522585	G	875	0.477106	PF07_0042	hypothetical protein, conserved
7	936167	A	15183	0.0429798	MAL7P1_105	hypothetical protein, conserved
7	936415	G	14935	0.480755
7	937328	A	14022	0.480755
7	937350	C	14000	0.326945
7	940007	G	11940	0.213323	PF07_0085	ferrodoxin reductase-like protein
7	940111	T	12044	0.213323	PF07_0085	ferrodoxin reductase-like protein
7	940147	A	12080	0.213323	PF07_0085	ferrodoxin reductase-like protein
8	329153	T	7371	0.457047	PF08_0117	hypothetical protein, conserved
8	336524	T	6205	0.192958	MAL8P1_135	hypothetical membrane protein, conserved
8	336524	T	5548	0.320664	MAL8P1_135	hypothetical membrane protein, conserved
8	452794	A	778	0.14921	PF08_0105	rifin
8	502511	C	10476	0.42047	PF08_0100	ruvB-like DNA helicase, putative
8	862485	A	33846	0.123915	PF08_0054	heat shock 70 kDa protein
8	866334	C	29997	0.044317	MAL8P1_64	hypothetical protein, conserved
8	1104023	T	8994	0.0590762
8	1114567	A	8029	0.0872789	MAL8P1_23	ubiquitin-protein ligase 1, putative
8	1114885	A	8347	0.32021	MAL8P1_23	ubiquitin-protein ligase 1, putative
8	1115227	T	8689	0.32021	MAL8P1_23	ubiquitin-protein ligase 1, putative
8	1117372	G	10834	0.0905236	MAL8P1_23	ubiquitin-protein ligase 1, putative
8	1118090	T	11552	0.062218	MAL8P1_23	ubiquitin-protein ligase 1, putative
8	1118190	T	11652	0.00912498	MAL8P1_23	ubiquitin-protein ligase 1, putative
9	272201	C	12632	0.125879	PFI0265c	RhopH3
9	282410	G	11553	0.0931947	PFI0275w	hypothetical protein, conserved
9	284833	T	12260	0.14921	PFI0280c	autophagocytosis associated protein, putative
9	284842	T	12269	0.14921	PFI0280c	autophagocytosis associated protein, putative
9	284910	G	12337	0.14921	PFI0280c	autophagocytosis associated protein, putative
9	286072	T	13499	0.325874	PFI0280c	autophagocytosis associated protein, putative
9	1049929	C	33703	0.276442	PFI1280c	protein kinase, putative
10	324964	G	45666	0.233529	PF10_0078	histone deacetylase, putative
10	325615	G	45015	0.394692	PF10_0078	histone deacetylase, putative
10	1434276	G	15967	0.336072	PF10_0355	Erythrocyte membrane protein, putative
12	50106	T	288	0.0872789	PFL0030c	erythrocyte membrane protein 1 (PfEMP1)
12	698129	T	16349	0.269275	PFL0855c	hypothetical protein, conserved
12	947550	A	63271	0.233529	PFL1130c	hypothetical protein, conserved
12	954384	C	56437	0.224991	PFL1130c	hypothetical protein, conserved
12	989670	T	43263	0.457047	PFL1170w	polyadenylate-binding protein, putative
12	990296	T	43303	0.0102644	PFL1170w	polyadenylate-binding protein, putative
12	1002740	T	55747	0.0567775
12	1002741	A	55748	0.0567775
12	1014265	T	30213	0.480009	PFL1205c	hypothetical protein, conserved
13	748596	A	8517	0.320664	MAL13P1_95	ferredoxin
14	271605	A	18762	0.457047	PF14_0073	hypothetical protein
14	279667	T	34730	0.0959306	PF14_0074	hypothetical protein
14	769803	A	17795	0.32021	PF14_0179	hypothetical protein
14	910328	T	27011	0.25327
14	960714	G	49486	0.0631092	PF14_0228	hypothetical protein
14	1225984	A	8890	0.044317	PF14_0291	hypothetical protein
14	1226019	T	8925	0.044317	PF14_0291	hypothetical protein
14	1226103	C	9009	0.152812	PF14_0291	hypothetical protein
14	1226130	C	9036	0.044317	PF14_0291	hypothetical protein
14	1226242	A	9148	0.0314042	PF14_0291	hypothetical protein
14	1226303	T	9209	0.024829	PF14_0291	hypothetical protein
14	1608531	A	54272	0.213323	PF14_0374	hypothetical protein
14	2812662	C	35145	0.172189	PF14_0653	hypothetical protein
14	2812679	T	35128	0.172189	PF14_0653	hypothetical protein
14	2838163	G	46456	0.221457	PF14_0660	hypothetical protein
